# Supplementary material for: CAG repeats mimic CUG repeats in the misregulation of alternative splicing
Source: PubMed Central journal article supplement — Nucleic Acids Res. 2011 Jul 27;39(20):8938–51. doi: 10.1093/nar/gkr608 (PMC3203611; doi:10.1093/nar/gkr608), 2011-07-27
Supplement: supp_gkr608_nar-02242-a-2010-File010.pdf [file supp_gkr608_nar-02242-a-2010-File010.pdf]

## SUPPLEMENTARY MATERIAL

**Table S1. Sequences of Primers Used for Amplification of Analyzed Genes.**

| Gene name     | Exon examined | Forward                  | Reverse                 | number of PCR cycles |
|---------------|---------------|--------------------------|-------------------------|----------------------|
| <i>ATE1</i>   | 7, 8          | GATTTGAGTAAGCCTCCATGTCCG | AAGGGTGAAGTGCAGGGAATC   | 25                   |
| <i>CAPZB</i>  | 8             | TCAGAAGTACGCTGAACGAGA    | TGATGCAGCTGTTATGTGACC   | 28                   |
| <i>CLCN1</i>  | 5, 6, 7, 8    | CATCTCTCCCCAGGCTGT       | GCATCCTTGTTCCACACT      | 30                   |
| <i>FHL1</i>   | 5             | AACCGCTTCTGGCATGACAC     | CGCTTGTTGGCCAGATTCAC    | 25                   |
| <i>INSR</i>   | 11            | CCAAAGACAGACTCTCAGAT     | AACATCGCCAAGGGACCTGC    | 26                   |
| <i>LDB3</i>   | 11            | GCAAGACCCTGATGAAGAAGCTC  | GACAGAAGGCCGGATGCTG     | 30                   |
| <i>MAPT</i>   | 2, 3          | AAGACCAAGAGGGTGACACG     | TTTTACTGACCATGCGAGCTT   | 26                   |
| <i>MBNL1</i>  | 7             | GCTGCCCAATACCAGGTC AAC   | TGGTGGGAGAAATGCTGTATGC  | 25                   |
| <i>PHKA</i>   | 19            | TGCACACACTTGAGCTTCATGGA  | AAAGTCCACCTCCCAGACTGGTC | 28                   |
| <i>SERCA1</i> | 22            | GCTCATGGTCCTCAAGATCTCAC  | AGCTCTGCCTGAAGATGTGTAC  | 30                   |
| <i>SOS1</i>   | 24            | CAGTACCACAGATGTTTGCAGTG  | TCTGGTCGTCTTCGTGGAGGAA  | 25                   |
| <i>ZNF289</i> | 8             | GACTCTGATTTCTTCACAGAACAC | TGCTCACGGAGCTTCTCTGCCA  | 28                   |

**Table S2. The Repeat Length and Expression Levels of EGFP Transcript Ccontaining CUG or CAG Repeats in the Stable Transfectant Cell Lines**

| Lp.         | cell line      | number of repeats | relative expression level [egfp/gapdh] | splicing changes |
|-------------|----------------|-------------------|----------------------------------------|------------------|
| <b>HeLa</b> |                |                   |                                        |                  |
| 1.          | HeLa (CUG) 5   | 5                 | 5.87                                   | N                |
| 2.          | HeLa (CUG) 5   | 5                 | 13.75                                  | N                |
| 3.          | HeLa (CUG) 5   | 5                 | 20.64                                  | N                |
| 4.          | HeLa (CUG) 5   | 5                 | 7.46                                   | N                |
| 5.          | HeLa (CUG) 5   | 5                 | 11.47                                  | N                |
| 6.          | HeLa (CUG) 30  | 30                | 2.63                                   | N                |
| 7.          | HeLa (CUG) 30  | 30                | 10.83                                  | N                |
| 8.          | HeLa (CUG) 30  | 30                | 5.67                                   | N                |
| 9.          | HeLa (CUG) 30  | 30                | 6.40                                   | N                |
| 10.         | HeLa (CUG) 74  | 74                | 2.41                                   | N                |
| 11.         | HeLa (CUG) 74  | 74                | 8.35                                   | N                |
| 12.         | HeLa (CUG) 74  | 74                | 10.54                                  | Y                |
| 13.         | HeLa (CUG) 74  | 74                | 5.34                                   | Y                |
| 14.         | HeLa (CUG) 74  | 74                | 50.22                                  | Y                |
| 15.         | HeLa (CUG) 74  | 74                | 4.43                                   | Y                |
| 16.         | HeLa (CUG) 200 | 200               | 1.16                                   | N                |
| 17.         | HeLa (CUG) 200 | 200               | 7.00                                   | Y                |
| 18.         | HeLa (CUG) 200 | 200               | 6.03                                   | Y                |
| 19.         | HeLa (CUG) 200 | 200               | 4.92                                   | Y                |

|                |                   |     |         |   |
|----------------|-------------------|-----|---------|---|
| 20.            | Hela (CAG) 5      | 5   | 2.24    | N |
| 21.            | Hela (CAG) 5      | 5   | 5.60    | N |
| 22.            | Hela (CAG) 5      | 5   | 10.05   | N |
| 23.            | Hela (CAG) 5      | 5   | 3.05    | N |
| 24.            | Hela (CAG) 30     | 30  | 8.13    | N |
| 25.            | Hela (CAG) 30     | 30  | 8.35    | N |
| 26.            | Hela (CAG) 30     | 30  | 4.67    | N |
| 27.            | Hela (CAG) 30     | 30  | 6.82    | Y |
| 28.            | Hela (CAG) 74     | 74  | 2.23    | N |
| 29.            | Hela (CAG) 74     | 74  | 1.60    | N |
| 30.            | Hela (CAG) 74     | 74  | 20.01   | Y |
| 31.            | Hela (CAG) 74     | 74  | 3.86    | Y |
| 32.            | Hela (CAG) 74     | 74  | 10.15   | Y |
| 33.            | Hela (CAG) 200    | 200 | 2.84    | N |
| 34.            | Hela (CAG) 200    | 200 | 10.36   | Y |
| 35.            | Hela (CAG) 200    | 200 | 3.45    | Y |
| <b>SK-N-MC</b> |                   |     |         |   |
| 36.            | SK-N-MC (CUG) 5   | 5   | 10.65   | N |
| 37.            | SK-N-MC (CUG) 5   | 5   | 7.38    | N |
| 38.            | SK-N-MC (CUG) 5   | 5   | 10.60   | N |
| 39.            | SK-N-MC (CUG) 5   | 5   | 2.72    | N |
| 40.            | SK-N-MC (CUG) 30  | 30  | 2.68    | N |
| 41.            | SK-N-MC (CUG) 30  | 30  | 20.72   | N |
| 42.            | SK-N-MC (CUG) 30  | 30  | 6.90    | Y |
| 43.            | SK-N-MC (CUG) 74  | 74  | 7.99    | N |
| 44.            | SK-N-MC (CUG) 74  | 74  | 4.51    | Y |
| 45.            | SK-N-MC (CUG) 74  | 74  | 10.43   | Y |
| 46.            | SK-N-MC (CUG) 74  | 74  | 9.48    | Y |
| 47.            | SK-N-MC (CUG) 74  | 74  | 10.67   | Y |
| 48.            | SK-N-MC (CUG) 200 | 200 | 4.51    | N |
| 49.            | SK-N-MC (CUG) 200 | 200 | 10.32   | Y |
| 50.            | SK-N-MC (CAG) 5   | 5   | 12.31   | N |
| 51.            | SK-N-MC (CAG) 5   | 5   | 6.48    | N |
| 52.            | SK-N-MC (CAG) 5   | 5   | 10.67   | N |
| 53.            | SK-N-MC (CAG) 5   | 5   | 60.40   | N |
| 54.            | SK-N-MC (CAG) 30  | 30  | 9.83    | N |
| 55.            | SK-N-MC (CAG) 30  | 30  | 2.82    | N |
| 56.            | SK-N-MC (CAG) 30  | 30  | 7.95    | Y |
| 57.            | SK-N-MC (CAG) 74  | 74  | 6.83    | N |
| 58.            | SK-N-MC (CAG) 74  | 74  | 24.784  | N |
| 59.            | SK-N-MC (CAG) 74  | 74  | 11.6009 | Y |
| 60.            | SK-N-MC (CAG) 74  | 74  | 4.51    | Y |
| 61.            | SK-N-MC (CAG) 74  | 74  | 10.32   | Y |
| 62.            | SK-N-MC (CAG) 74  | 74  | 40.39   | Y |
| 63.            | SK-N-MC (CAG) 200 | 200 | 7.45    | Y |
| 64.            | SK-N-MC (CAG) 200 | 200 | 5.89    | Y |

N - no change, Y- presence of splicing defects

**Table S3. MLPA Sense and Antisense.**

Provided as separate excel file.

**Figure S1. Steady-State Levels of CUGBP1 and MBNL1 in HeLa, SK-N-MC Cells and Human Fibroblasts are Similar.**

Relative expression levels of CUGBP1 and MBNL1 were determined using western blot analysis and shown as bar graphs which represent mean values ( $\pm$ SD) of three independent experiments normalized to GAPDH level.

**Figure S2. Similar Aberrations in Alternative Splicing are Observed in SK-N-MC Cells Expressing Untranslated CUG and CAG Repeats.**

Total RNA isolated from clonal lines of SK-N-MC cells was subjected to RT-PCR using *SERCA1*, *CLCN1*, *MAPT*, *CAPZB*, and *ATE1* specific primers. SK-N-MC cells with siRNA downregulated MBNL1 protein (siMBNL1) were used as a positive control. The experiments were carried out in triplicate and representative gels are shown. The fraction of exon inclusion/exclusion ( $\pm$ SD) shown on bar diagrams was calculated by dividing the amount of the band corresponding to the inclusion/exclusion splice product by the total amount of splice products. \* $P < 0.05$ ; 0.001>, \*\* $P < 0.001$  compared with the control.

**Figure S3. Binding Sites of MLPA Probes.**

ccggacucag aucucgagcu caagcuucga auucugcagu cgacgguacc gcgggcccgg  
gauccaucgc caccauggug agcaagggcg aggagcuguu caccggggug gugcccaucc  
uggucgagcu ggacggcgac guaaacggcc acaaguucag cguguccggc gagggcgagg



Total RNA isolated from clonal lines of SK-N-MC cells was subjected to RT-PCR using *SERCA1*, , *MAPT*, and *ATE1* specific primers. The experiments were carried out in triplicate and representative gels are shown. The fraction of exon inclusion/exclusion ( $\pm$ SD) shown on bar diagrams was calculated by dividing the amount of the band corresponding to the inclusion/exclusion splice product by the total amount of splice products

**Figure S6. *Expression of CAG and CUG RNA Repeats does not Affect CUGBP1 Upregulation.***

The CUGBP1 steady-state levels in cells expressing CTG and CAG repeats of indicated lengths were analyzed by western blotting. As shown, in both cell lines the protein levels remain unchanged in the presence of repeat containing transcripts regardless of their length when compared with control cells. GAPDH was used as a loading control.

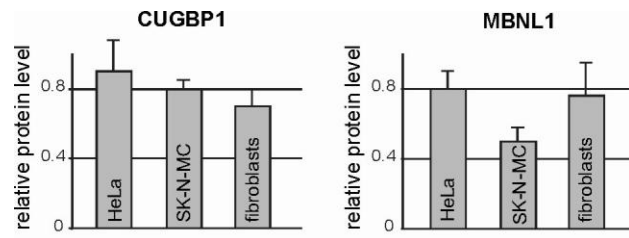

Figure S1

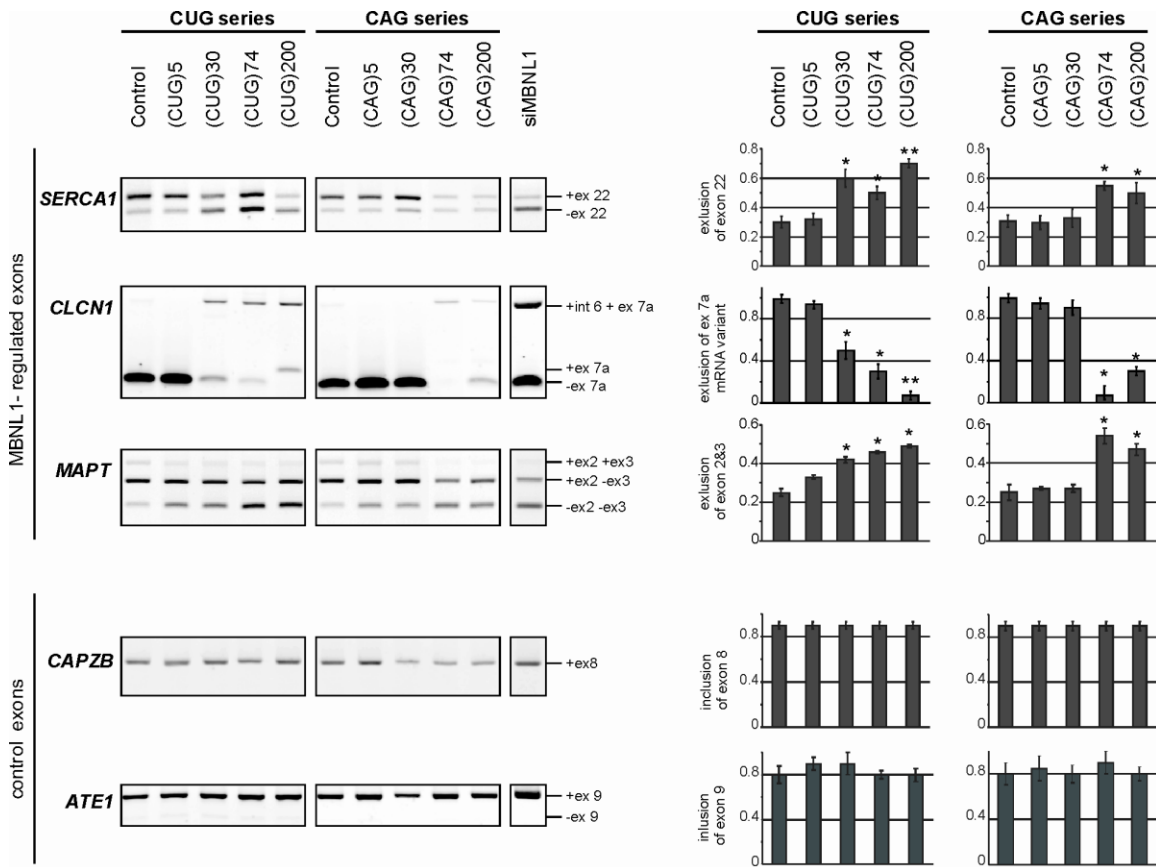

Figure S2

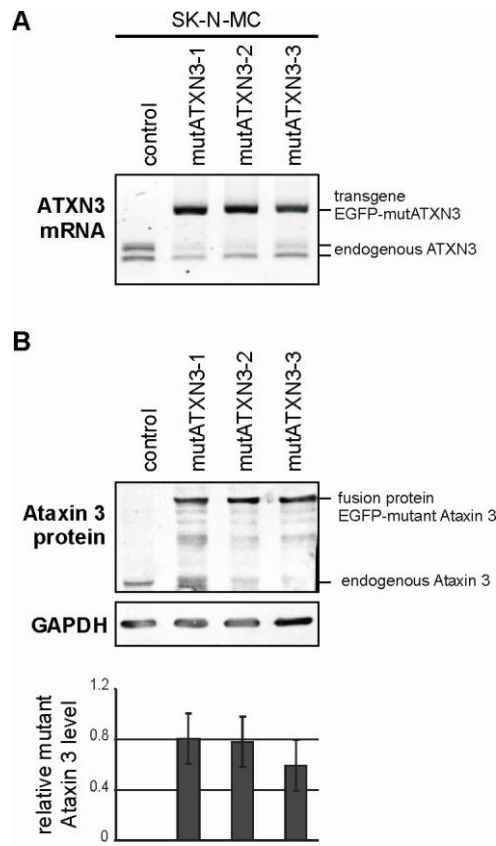

Figure S4



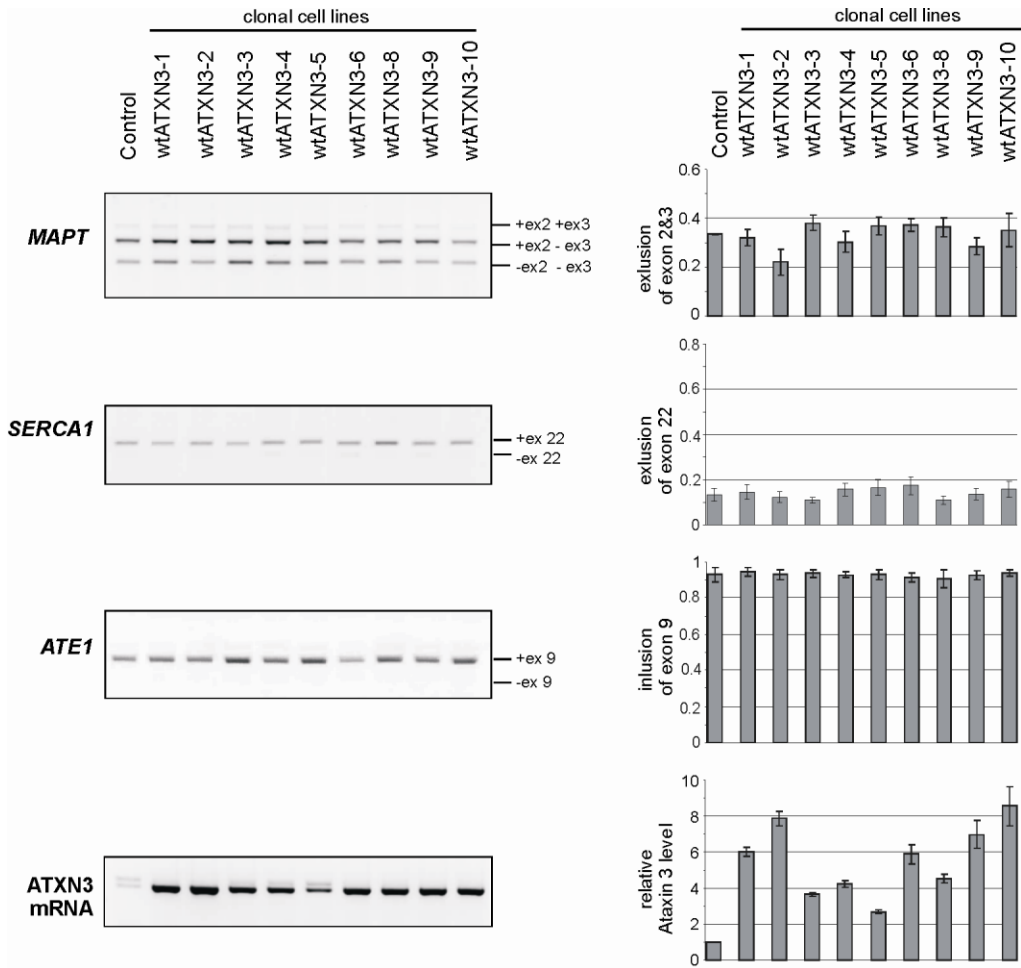

Figure S5

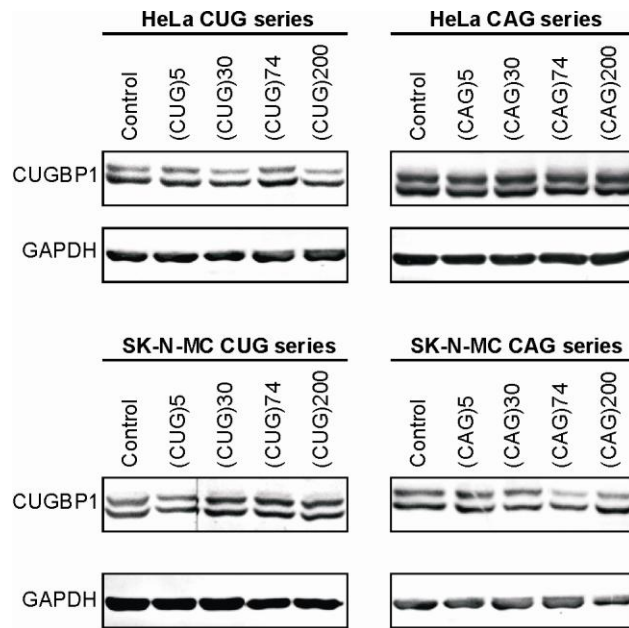

Figure S6
